# Supplementary material for: Chicory inulin enhances fermentation of 2′-fucosyllactose by infant fecal microbiota and differentially influences immature dendritic cell and T-cell cytokine responses under normal and Th2-polarizing conditions
Source: Royal Society of Chemistry journal article supplement (doi:10.1039/d1fo00893e), 2021-01-01
Supplement: d1fo00893e1.pdf [file d1fo00893e1.pdf]

## Supplementary figures

### Chicory inulin enhances fermentation of 2'-fucosyllactose by infant fecal microbiota and differentially influences immature dendritic cell and T-cell cytokine responses under normal and Th2-polarizing conditions

Renate Akkerman, Madelon J. Logtenberg, Martin Beukema, Bart J. de Haan, Marijke M. Faas, Erwin G. Zoetendal, Henk A. Schols and Paul de Vos

| <i>Bifidobacterium</i> (%) | native inulin |      | 2'-FL |      | native inulin + 2'-FL |      | control |      |
|----------------------------|---------------|------|-------|------|-----------------------|------|---------|------|
|                            | 1             | 2    | 1     | 2    | 1                     | 2    | 1       | 2    |
| 0h                         | 0.48          | 0.44 | 0.45  | 0.47 | 0.60                  | 0.58 | 0.51    | 0.61 |
| 18h                        | 0.46          | 0.44 | 0.31  | 0.32 | 0.26                  | 0.42 | 0.32    | 0.38 |
| 36h                        | 0.81          | 0.83 | 0.68  | 0.61 | 0.81                  | 0.79 | 0.24    | 0.29 |

Table S1. Relative abundance of *Bifidobacterium* in fermentation digesta collected at the start and after 18 and 36 h of fermentation of native inulin, 2'-FL, native inulin/2'-FL or the control, using pooled fecal inoculum of 8-week-old infants. Fermentations were performed in duplicate with each individual series presented individually.

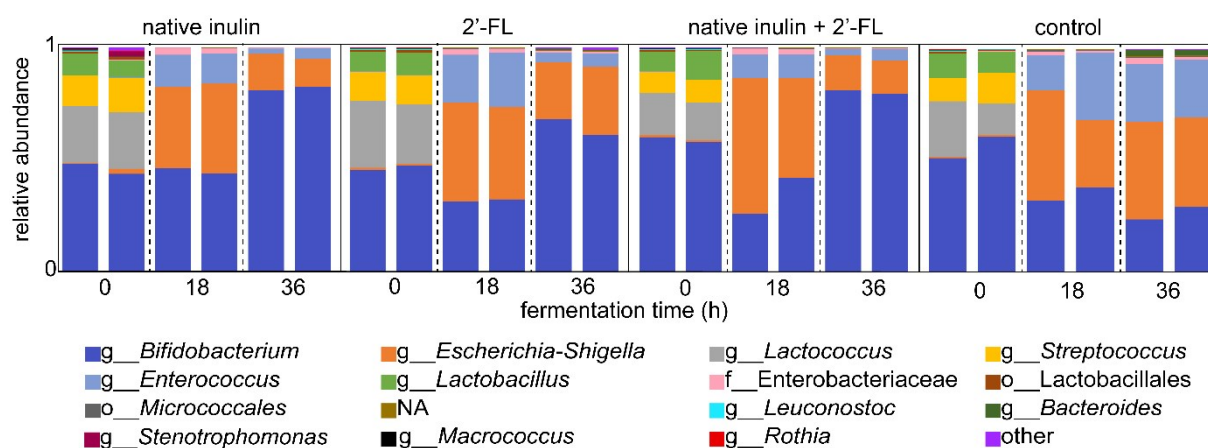

Figure S2. Relative abundance of bacteria at the highest classified taxonomy in fermentation digesta collected at the start and after 18 and 36 h of fermentation of native inulin, 2'-FL, native inulin/2'-FL or the control, using pooled fecal inoculum of 8-week-old infants. Fermentations were performed in duplicate with each individual series presented individually.

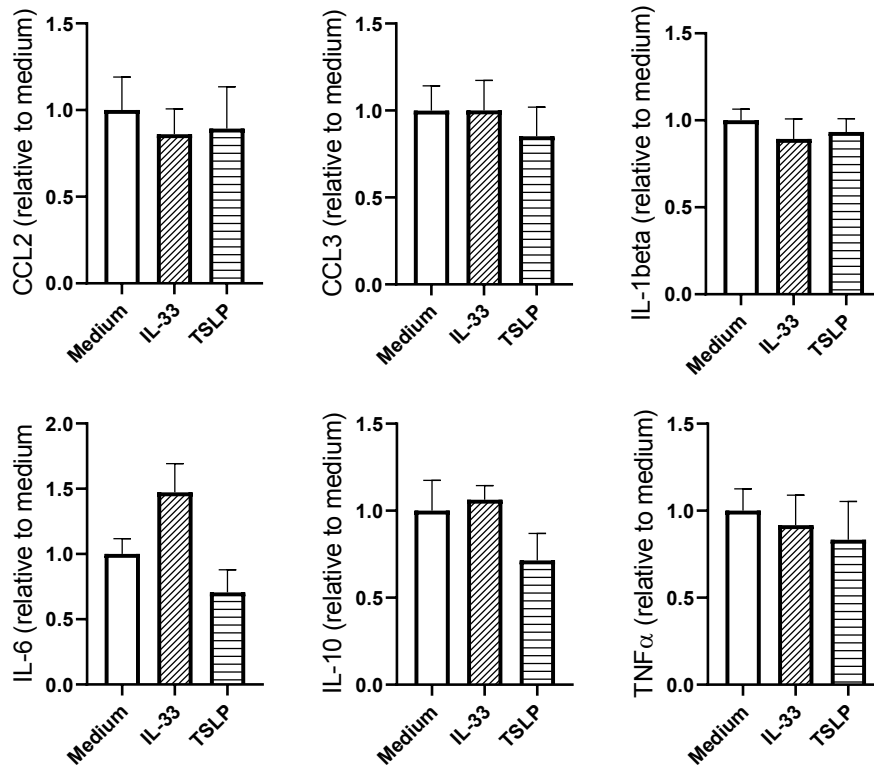

Figure S3. Cytokine secretion by immature dendritic cells when incubated in normal medium or medium containing IL-33 or TSLP. Differences between groups were tested using a REML mixed-effects analysis followed by a Tukey's post-test. No significant differences were found. N=4-6.
